# Supplementary material
Source: PubMed Central journal article supplement (PMC2713559)
Supplement: supp_M109.002980_Suppdata.pdf [file supp_M109.002980_Suppdata.pdf]

## SUPPLEMENTAL MATERIAL

Table 1. Oligonucleotides used in this study

| Oligonucleotides<br>(mutation, restriction site)                  | Oligonucleotides (Individual or annealed) <sup>a</sup>                                                                               |
|-------------------------------------------------------------------|--------------------------------------------------------------------------------------------------------------------------------------|
| SC69/70<br>( <i>b</i> <sub>I76C</sub> , + <i>Nde</i> I)           | SC69 - 5' GCCCAGGTCATATGCGAGCAGGCGAACAAACGCCGC 3'<br>SC70 - 3' CGGGTCCAGTATACGCTCGTCCGCTTGTGGCGCG 5'                                 |
| SC71/72<br>( <i>b</i> <sub>R83C</sub> , + <i>Bgl</i> II)          | SC71 - 5' CATCGAGCAGGCGAACAAACGCTGCTCGCAGATCTTAGACGAAGCG 3'<br>SC72 - 3' GTAGCTCGTCCGCTTGTGGCGACGAGCGTCTAGAATCTGCTTCGC 5'            |
| SC73/74<br>( <i>b</i> <sub>A90C</sub> , + <i>Bgl</i> II)          | SC73 - 5' CGCCGCTCGCAGATCTTAGACGAATGCAAAGCTGAGGCAGAACAG 3'<br>SC74 - 3' GCGGCGAGCGTCTAGAATCTGCTTACGTTTCGACTCCGCTTTGTC 5'             |
| SC75/76<br>( <i>b</i> <sub>E97C</sub> , + <i>Bts</i> I)           | SC75 - 5' GCTGAGGCAGAGCAGTCCCGTACTAAAATCGTGGCCCG 3'<br>SC76 - 3' CGACTCCGTCTCGTCACGGCATGATTTAGCACCGGGTC 5'                           |
| MP7/8<br>( <i>Tb</i> <sub>A83C</sub> , + <i>Mlu</i> I)            | MP7 - 5' CGTGAAGATGCTCTGACGCGTTGCAAAGCTGTTCTAGACGAAGC 3'<br>MP8 - 3' GCACCTTCTACGAGACTGCGCAACGTTTCGACAAGATCTGCTTCG 5'                |
| MP9/10<br>( <i>Tb</i> <sub>A90C</sub> , + <i>Mlu</i> I)           | MP9 - 5' GATGCTCTGACGCGTGCTAAAGCTGTTCTAGACGAATGCAAAGCTGAGGC 3'<br>MP10 - 3' CTACGAGACTGCGCACGATTCGACAAGATCTGCTTACGTTTCGACTCCG 5'     |
| MP11/12<br>( <i>Tb</i> ' <sub>A83C</sub> , + <i>Mlu</i> I)        | MP11 - 5' GGCTCAGGCTCTGATCGAAGAAGCAGCGTGAATGTCAGAAAATCTAGACG 3'<br>MP12 - 3' CCGAGTCCGAGACTAGCTTCTTCGTGCGCAACTTACAGTCTTTAAGATCTGC 5' |
| MP13/14<br>( <i>Tb</i> ' <sub>A90C</sub> , + <i>Mlu</i> I)        | MP13 - 3' CGAAGAAGCAGCGTGAAGCTCAGAAAATCTAGACGAATGTAAGCTGAGGC 5'<br>MP14 - 5' GCTTCTTCGTGCGCAACTTCGAGTCTTTAAGATCTGCTTACATTCGACTCCG 3' |
| SD101<br>( <i>Tb</i> <sub>D53-Fwd</sub> , + <i>Nde</i> I)         | SD101 - 5' GGATTCATATGTCTTACGTTGCCGCGC 3'                                                                                            |
| SD102<br>( <i>Tb</i> ' <sub>D53-Fwd</sub> , + <i>Nde</i> I)       | SD102 - 5' GGATTCATAIGTCTTACCAGGCTACTGAGCTAG 3'                                                                                      |
| SD103<br>( <i>b</i> <sub>K122-Rev</sub> , +GGGC, <i>Hind</i> III) | SD103 - 5' CCGGAAGCTTAACAACCACCACCCTTACGCAGCTCTTC 3'                                                                                 |
| SD104<br>( <i>b</i> <sub>L156-Rev</sub> , + <i>Hind</i> III)      | SD104 - 5' CCTGGAAGCTTAGAGCTCAGCGACAAGTTTATCCAC 3'                                                                                   |

a – Added restriction sites are underlined
